# Supplementary material for: A Simple Tool to Predict Genetic Focal Segmental Glomerulosclerosis
Source: Research Square preprint supplement (doi:10.21203/rs.3.rs-8630004/v1), 2026-02-03
Supplement: Supplementary file 1 [file 9708e290cc6f32b9df78c890.docx]

Supplementary Table 1. Pathogenic variants prediction models by multivariate logistic regression analysis in development cohort

|  |  | R2 | AUC (95% CI) | OR (95% CI) |
| --- | --- | --- | --- | --- |
| **Model 1** |  | 0.27 | 0.83 (0.77-0.90) |  |
| Male (*ref* Female) |  |  |  | 2.27 (1.08-4.78) |
| Onset age (*ref* ＞20yrs) |  |  |  | 3.94 (1.64-9.46) |
| Non-NS (*ref* NS) |  |  |  | 6.29 (2.68-14.79) |
| eGFR (*ref* ＞30 ml/min/1.73 m2) |  |  |  | 11.13 (4.12-30.05) |
| **Model 2** |  | 0.28 | 0.84 (0.78-0.91) |  |
| Male (*ref* Female) |  |  |  | 2.27 (1.08-4.78) |
| Onset age (*ref* ＞20yrs) |  |  |  | 4.06 (1.68-9.84) |
| eGFR (*ref* ＞30 ml/min/1.73 m2) |  |  |  | 9.48 (3.54-25.41) |
| Non-NS (*ref* NS) |  |  |  | 24.34 (2.85-208.01) |
| SRNS (*ref* Non-SRNS) |  |  |  | 4.98 (0.58-42.94) |
| **Model 3** |  | 0.62 | 0.91 (0.86-0.96) |  |
| Male (*ref* Female) |  |  |  | 2.75 (1.07-7.04) |
| eGFR (ml/min/1.73 m2) (≤30) |  |  |  | 5.94 (1.81-19.51) |
| Non-NS (*ref* NS) |  |  |  | 11.04 (2.95-41.26.59) |
| DI (*ref* Non-DI) |  |  |  | 17.61 (5.80-53.48) |

Note: NS, nephrotic syndrome; eGFR, estimated glomerular filtration rate; SRNS, steroid resistant FSGS; DI, dominant inheritance.

Supplementary Table2 The Calculation process of risk score for the independent risk factors[25]

| Risk factor | Categories | Reference value (Wij) | Bi | Bi（Wij－Wref） | Risk score |
| --- | --- | --- | --- | --- | --- |
| Sex |  |  | 1.01 |  |  |
|  | Male | 1 |  | 1.01 | 1 |
|  | Female | 0=Wref |  | 0 | 0 |
| eGFR |  |  | 1.78 |  |  |
|  | ≤30 | 1 |  | 1.78 | 2 |
|  | ＞30 | 0=Wref |  | 0 | 0 |
| NS |  |  | 2.40 |  |  |
|  | No | 1 |  | 2.40 | 3 |
|  | Yes | 0=Wref |  | 0 | 0 |
| DI |  |  | 2.87 |  |  |
|  | Yes | 1 |  | 2.87 | 4 |
|  | No | 0=Wref |  | 0 | 0 |

Note: Risk score= Bi(Wij－Wref)/B. “B” equals to 0.8 as a constant and the value rounded to the nearest half or whole number.

**Whole exome sequencing in 197 patients from the development cohort and 155 patients from the validation cohort**

**Sequence capture by Twist Human Core Exome kit and performed on Illumina NovaSeq 6000 platform**

**Sequence reads alignment (GRCh37/hg19 as reference genome)**

**Genotype and variants calling by GATK pipeline**

**Synonymous and intronic variants were removed; Variants present in healthy individuals were removed**

**Variants scored by ACMG criteria**

Supplementary Figure 1 Flow chart of gene mutation screening
